# Supplementary material for: The Bradyrhizobium diazoefficiens type III effector NopE modulates the regulation of plant hormones towards nodulation in Vigna radiata
Source: PubMed Central journal article supplement (PMC8367979; doi:10.1038/s41598-021-95925-4), 2021-08-16
Supplement: 41598_2021_95925_MOESM1_ESM.pdf [file 41598_2021_95925_MOESM1_ESM.pdf]

## Supplementary materials

### **The *Bradyrhizobium diazoefficiens* type III effector NopE modulates the regulation of plant hormones towards nodulation in *Vigna radiata***

Pongdet Piromyou<sup>1, †</sup> and Hien P. Nguyen<sup>2, 7, †</sup>, Pongpan Songwattana<sup>1</sup>, Pakpoom Boonchuen<sup>1</sup>, Kamonluck Teamtison<sup>3</sup>, Panlada Tittabutr<sup>1</sup>, Nantakorn Boonkerd<sup>1</sup>, Piyada Alisha Tantasawat<sup>4</sup>, Michael Göttfert<sup>5</sup>, Shin Okazaki<sup>6, \*</sup>, Neung Teaumroong<sup>1, \*</sup>

1 School of Biotechnology, Institute of Agricultural Technology, Suranaree University of Technology, Nakhon Ratchasima, 30000, Thailand

2 Institute of Global Innovation Research (IGIR), Tokyo University of Agriculture and Technology (TUAT), Fuchu, Tokyo 183-8538, Japan

3 The Center for Scientific and Technological Equipment, Suranaree University of Technology, Nakhon Ratchasima 30000, Thailand

4 School of Crop Production Technology, Institute of Agricultural Technology, Suranaree University of Technology, Nakhon Ratchasima 30000, Thailand

5 Technische Universität Dresden, Institut für Genetik, Helmholtzstrasse 10, 01062 Dresden, Germany

6 Graduate School of Agriculture, TUAT, Fuchu, Tokyo 183-8509, Japan

7 Beltsville Agricultural Research Center (BARC), Agricultural Research Service (ARS), the U.S. Department of Agriculture (USDA), Beltsville, MD 20705, USA

† These authors contributed equally as co-first authors: Pongdet Piromyou and Hien P. Nguyen



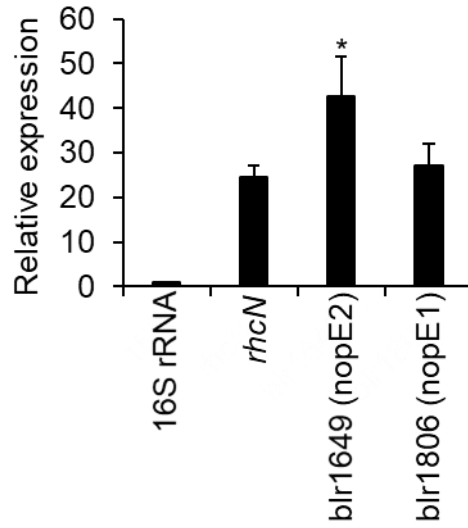

**Figure S2** The relative expression of 16S rRNA, *rhcN*, and putative T3Es genes (*nopE1* and *nopE2*) of *B. diazoefficiens* USDA110 after induction with genistein. The level of expression was measured using qRT-PCR. Values represent mean  $\pm$  SD (n = 3), “\*”,  $P < 0.05$  according to Student’s *t*-test.

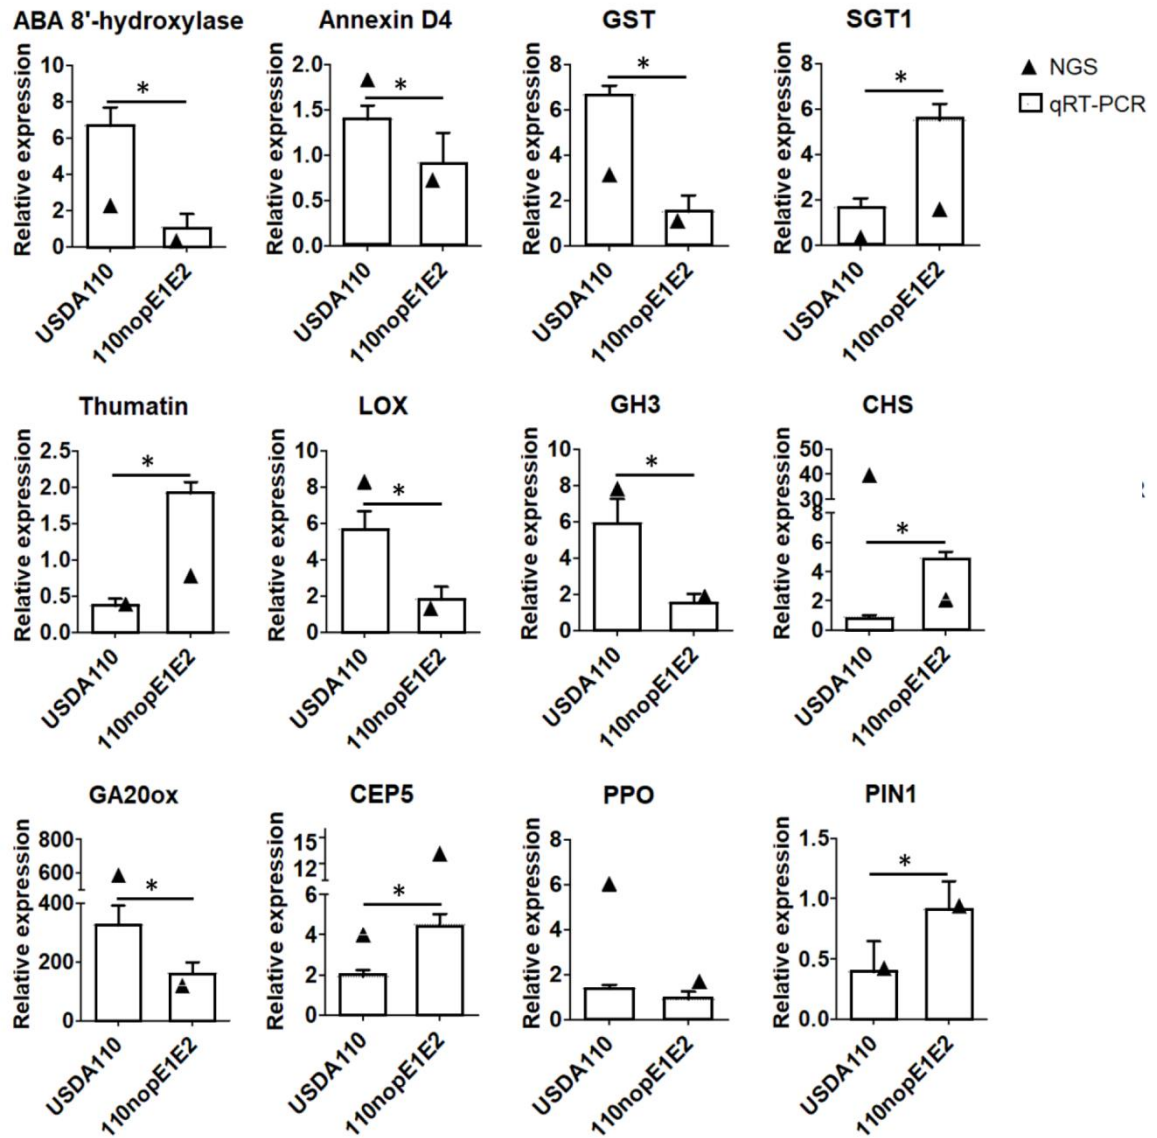

**Figure S3** qRT-PCR verification from RNA-seq analysis data for *Vigna radiata* cv. KPS1 between USDA110 and 110nopE1E2 inoculations at and 4 dpi. Significance is indicated by the mean  $\pm$  standard deviation ( $n=3$ ), “\*”,  $P < 0.05$  according to Student’s  $t$ -test.

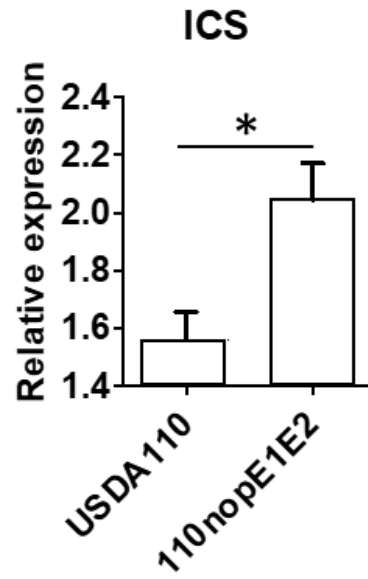

**Figure S4** qRT-PCR analysis data for *Vigna radiata* cv. KPS1 between USDA110 and 110nopE1E2 inoculations at and 4 dpi. Significance is indicated by the mean $\pm$ standard deviation (n=3), “\*”,  $P < 0.05$  according to Student’s  $t$ -test.

**Table S1** Symbiotic phenotypes of *Vigna radiata* varieties inoculated with bradyrhizobial strains.

| <i>V. radiata</i> variety                                                                           | <i>Bradyrhizobium diazoefficiens</i> * |         |         |            |
|-----------------------------------------------------------------------------------------------------|----------------------------------------|---------|---------|------------|
|                                                                                                     | USDA110 or 110spc4                     | 110ttsI | 110T3SS | 110nopE1E2 |
| <i>V. radiata</i> var. <i>radiata</i> (Thai cultivated cultivars)                                   |                                        |         |         |            |
| KPS1                                                                                                | +++                                    | +       | +       | +          |
| KPS2                                                                                                | –                                      | +++     | +++     | +++        |
| SUT1                                                                                                | +++                                    | +       | +       | +          |
| SUT2                                                                                                | +++                                    | +       | +       | +          |
| SUT3                                                                                                | +++                                    | +       | +       | +          |
| SUT4                                                                                                | +++                                    | +       | +       | +          |
| SUT5                                                                                                | +++                                    | +       | +       | +          |
| CN36                                                                                                | +++                                    | +       | +       | +          |
| CN72                                                                                                | +++                                    | +       | +       | +          |
| CN84-1                                                                                              | +++                                    | +       | +       | +          |
| M4-2                                                                                                | +++                                    | +       | +       | +          |
| M5-1                                                                                                | +++                                    | +       | +       | +          |
| PSU-1                                                                                               | +++                                    | +       | +       | +          |
| <i>V. radiata</i> var. <i>radiata</i> (From Asian Vegetable Research and Development Centre: AVRDC) |                                        |         |         |            |
| V3092                                                                                               | ++                                     | +       | +       | +          |
| V3131                                                                                               | ++                                     | +       | +       | +          |
| V3387                                                                                               | +                                      | ++      | ++      | ++         |
| V3464                                                                                               | ++                                     | +       | +       | +          |
| V4451                                                                                               | +                                      | ++      | ++      | ++         |
| V5197                                                                                               | +                                      | ++      | ++      | ++         |

+, efficient nodulation. The number of “+” indicate levels of nodulation efficiency.

\*, Nodule formation was statistically difference between wild type and T3SS mutant strain.

**Table S2** Bacterial strains used in this study.

| Strains                              | Characteristics <sup>a</sup>                                                                                                                                                        | Reference                         |
|--------------------------------------|-------------------------------------------------------------------------------------------------------------------------------------------------------------------------------------|-----------------------------------|
| <i>Bradyrhizobium diazoefficiens</i> |                                                                                                                                                                                     |                                   |
| USDA110                              | Wild-type strain, Pol <sup>r</sup>                                                                                                                                                  | USDA <sup>b</sup>                 |
| 110spc4                              | A spectinomycin-resistant derivative of <i>B. diazoefficiens</i> USDA110, Sp <sup>r</sup>                                                                                           | (Regensburger and Hennecke, 1983) |
| 110T3SS                              | $\Delta(nolB, rhcJ, nolU, nolV, \text{ and } rhcN)$ , previously designated as $\Delta 132$ mutant derived from <i>B. diazoefficiens</i> 110spc4, Km <sup>r</sup> , Sp <sup>r</sup> | (Wenzel et al., 2010)             |
| 110nopE1                             | <i>nopE1</i> replaced by <i>aadA</i> from pHP45 $\Omega$ , previously designated as BJD $\Delta$ 718 mutant, Sp <sup>r</sup> , Sm <sup>r</sup>                                      | (Wenzel et al., 2010)             |
| 110nopE2                             | Disruption of <i>nopE2</i> by cointegration of plasmid pBJD215, previously designated as BJD215 mutant, Tc <sup>r</sup>                                                             | (Wenzel et al., 2010)             |
| 110nopE1E2                           | <i>nopE1</i> and <i>nopE2</i> deletion mutant, previously designated as BJD $\Delta$ 718- $\Delta$ 644 mutant, Sp <sup>r</sup> , Sm <sup>r</sup> , Km <sup>r</sup>                  | (Wenzel et al., 2010)             |
| 110E1E2::E1                          | 110E1E2 derivative complemented with the wild-type <i>nopE1</i> , previously designated as BJD735, Sp <sup>r</sup> , Sm <sup>r</sup> , Km <sup>r</sup> , Tc <sup>r</sup>            | (Wenzel et al., 2010)             |
| 110E1E2::ncE1                        | 110E1E2 derivative complemented with the non-cleavable <i>nopE1</i> variant, previously designated as BJD740, Sp <sup>r</sup> , Sm <sup>r</sup> , Km <sup>r</sup> , Tc <sup>r</sup> | (Wenzel et al., 2010)             |

<sup>a</sup>Pol<sup>r</sup>, polymyxin resistant; Km<sup>r</sup>, kanamycin resistant; Sm<sup>r</sup>, streptomycin resistant; Sp<sup>r</sup>, spectinomycin resistant; Tc<sup>r</sup>, tetracycline resistant.

<sup>b</sup>United States Department of Agriculture, Beltsville, MD.

**Table S3** Pedigree, origin and relevant characteristics

| Genotype | Pedigree                                    | Origin   | Source or reference   |
|----------|---------------------------------------------|----------|-----------------------|
| KPS1     | Mass selection from VC1973A (V3476 x V1400) | Thailand | SUT <sup>1, (a)</sup> |
| KPS2     | Mass selection from VC2778A                 | Thailand | SUT <sup>1, (a)</sup> |
| SUT1     | UTHONG1 x NP29                              | Thailand | SUT <sup>2, (b)</sup> |
| SUT2     | -                                           | Thailand | SUT <sup>2, (b)</sup> |
| SUT3     | -                                           | Thailand | SUT <sup>2, (b)</sup> |
| SUT4     | MV1 x (MX4-7MO317 x MO277)                  | Thailand | SUT <sup>2, (b)</sup> |
| SUT5     | -                                           | Thailand | SUT <sup>2, (b)</sup> |
| CN36     | PAGASA1 x PHLV18                            | Thailand | SUT <sup>1, (c)</sup> |
| CN72     | Selection from mutated KPS2                 | Thailand | SUT <sup>3, (c)</sup> |
| CN84-1   | Selection from mutated CN36                 | Thailand | SUT <sup>4, (c)</sup> |
| M4-2     | Selection from mutated KPS1                 | Thailand | SUT <sup>5, (a)</sup> |
| M5-1     | Selection from mutated KPS1                 | Thailand | SUT <sup>5, (a)</sup> |
| PSU-1    | Mass selection from VC2768A                 | Thailand | SUT <sup>1, (d)</sup> |
| V3092    | -                                           | India    | AVRDC <sup>(e)</sup>  |
| V3131    | -                                           | -        | AVRDC <sup>(e)</sup>  |
| V3387    | -                                           | -        | AVRDC <sup>(e)</sup>  |
| V3464    | -                                           | -        | AVRDC <sup>(e)</sup>  |
| V4451    | -                                           | -        | AVRDC <sup>(e)</sup>  |
| V4785    | -                                           | India    | AVRDC <sup>(e)</sup>  |
| V5197    | -                                           | -        | AVRDC <sup>(e)</sup>  |

- = unknown data

SUT = Seed was provided by Professor Piyada Alisha Tantasawat, Suranaree University of Technology, Thailand

AVRDC = Seed was provided by Asian Vegetable Research and Development Center/ World Vegetable Center, Taiwan

<sup>(a)</sup> = Varieties from Kasetsart University, Kamphaeng Saen Campus, Thailand

<sup>(b)</sup> = Varieties developed at Suranaree University of Technology, Thailand

<sup>(c)</sup> = Varieties developed at Chai Nat Field Crops Research Center, Thailand

<sup>(d)</sup> = Variety from Prince of Songkla University, Thailand

<sup>(e)</sup> = Varieties obtained from the World Vegetable Center, Taiwan



**Table S4** Primers used in this study

| Target                                  | Primer name            | Primer sequence (5'→3') |
|-----------------------------------------|------------------------|-------------------------|
| 16S rRNA                                | PBA338F                | ACTCCTACGGGAGGCAGCAG    |
|                                         | PRUN518R               | ATTACCGCGGCTGCTGG       |
| <i>rhcN</i>                             | U110-rhcNf             | CCGCGTGATCGACAGTTTTG    |
|                                         | U110-rhcNr             | GCGCCGTTTCATCGGATTAG    |
| blr1649 ( <i>nopE2</i> )                | U110-blr1649f          | ATATACGATCACAGCCAATG    |
|                                         | U110-blr1649r          | ATCCTTGCCGTCCCCGTTAG    |
| blr1806 ( <i>nopE1</i> )                | U110-blr1806f          | CTACCAGTACTTGCCGGTAG    |
|                                         | U110-blr1806r          | ATGTACGCCTGCGTCGTAAC    |
| <i>Vigna radiata</i> : actin-3          | VrActin.f              | CAGTGTCTGGATTGGAGGCT    |
|                                         | VrActin.r              | GTCCCTCGACCACTTGATG     |
| <i>Vigna radiata</i> : NDR1             | Vir-NDR1.F             | TTTACGTTCTGCCCTCAAC     |
|                                         | Vir-NDR1.R             | GAGGTGAACGTCGTCGTATTT   |
| <i>Vigna radiata</i> : PAR1             | Vir-Par1.F             | CTGCCAAGGAAGGTAATGAAGA  |
|                                         | Vir-Par1.R             | GCCAGAATATAGCCAGCAGTT   |
| <i>Vigna radiata</i> : EDS1             | Vir-EDS1L.F            | GGTATGGGATGAGGTGATTGAG  |
|                                         | Vir-EDS1L.R            | CCGATGGTAGTTGGCTATGTC   |
| <i>Vigna radiata</i> : PTi5             | PTI5-Vr.f              | CTCACCAAAGACTCCACCAA    |
|                                         | PTI5-Vr.r              | ACGATTTTCGGCTGGGAAA     |
| <i>Vigna radiata</i> : PTi6             | PTI6-Vr.f              | CTTTAACCCGACCCGAGAAG    |
|                                         | PTI6-Vr.r              | GCGAAACGTGGAGTTCTCT     |
| <i>Vigna radiata</i> : PR1              | PR1-Vr.f               | CGAATGGACCTTATGGTGAGAA  |
|                                         | PR1-Vr.r               | TTACCAGGAGGTCGTAGTT     |
| <i>Vigna radiata</i> : PR2              | PR2-Vr.f               | CCCAAAGGCTGTTGATTCCTTC  |
|                                         | PR2-Vr.r               | CGTTGAGGCCATCACTCAATA   |
| <i>Vigna radiata</i> : PR4              | PR4-Vr.f               | ATAATGTCCGGGCCACATATC   |
|                                         | PR4-Vr.r               | ACAATCCTCACCGTTGTCTG    |
| <i>Vigna radiata</i> : PR5              | PR5-Vr.f               | CGCTCAACCCGACTTCTAC     |
|                                         | PR5-Vr.r               | AGTTCCTCTGCAGCAATAC     |
| <i>Vigna radiata</i> : ICS              | Vir-ICS2.F             | CACTAGGGTCGTACCTACTTCT  |
|                                         | Vir-ICS2.R             | TAGTTGCTCTGGTGTGTTTCC   |
| <i>Vigna radiata</i> : GLY2             | Vir-GLY2.F             | GCTTTGCTTGGTGCTGATTAC   |
|                                         | Vir-GLY2.R             | TTGGCGAGGATTCGTAGTG     |
| <i>Vigna radiata</i> : CHS              | Chalcone.exp.f         | ACCCCAACATAAGCACTTAC    |
|                                         | Chalcone.exp.r         | AGCCTGACAAGTTGGTAATC    |
| <i>Vigna radiata</i> : PDF              | Vr-defensin.exp.f      | GAGGCAAAGACTTGCGAGAAC   |
|                                         | Vr-defensin.exp.r      | TTCGGGTTGGGGAGAATCCGGTT |
| <i>Vigna radiata</i> : GA2ox            | GA-2.exp.f             | CGTCAACCACGGTGTTCATTG   |
|                                         | GA-2.exp.r             | CCAACCGACATCGCCGTTTG    |
| <i>Vigna radiata</i> : GA20ox           | GA-20.exp.f            | AGAAGTACTGCGATGGTATG    |
|                                         | GA-20.exp.r            | CTGTCCCCAACGTAAGGTTT    |
| <i>Vigna radiata</i> : ABA 8'-hydrolase | ABA 8'-hydrolase.exp.f | CAAGAGAAAGGAGCAGAGATTG  |
|                                         | ABA 8'-hydrolase.exp.r | GTAGTATCCTGAGCTGCAAAC   |
| <i>Vigna radiata</i> : Annex D4         | Annexin.exp.f          | AGGCAGTTTACAAGCACTAC    |
|                                         | Annexin.exp.r          | ATCAATTCTCAATGCTGCATTC  |
| <i>Vigna radiata</i> : GST              | PeroxidaseA2.exp.f     | GTTGCGATGGATCAGTTTTG    |
|                                         | PeroxidaseA2.exp.r     | AAGCTACTTCAGCTGCAATG    |
| <i>Vigna radiata</i> : SGT1             | SGT1.exp.f             | GCAAGTTCCCATCACACAAAG   |
|                                         | SDT1.exp.r             | CAATCAGCTTCGTGGATGTTG   |
| <i>Vigna radiata</i> : Thumatin         | Thaumatococcus.exp.f   | TCTCCCTGGTTGATGGTTTC    |
|                                         | Thaumatococcus.exp.r   | CGTCTTAAACACAGTGCATG    |
| <i>Vigna radiata</i> : LOX              | LOX.exp.f              | CTTCCAAGGGATGAATCATTG   |
|                                         | LOX.exp.r              | GTCCACGCACATCAAAG       |
| <i>Vigna radiata</i> : GH3              | GH3.exp.f              | AAAGGCAAGGGTATGTACTTTC  |
|                                         | GH3.exp.r              | AATGGGGCTGGTGTAGTTTG    |
| <i>Vigna radiata</i> : CEP5             | CEP5.exp.f             | AGGAGCACGTGATGGGAATG    |
|                                         | CEP5.exp.r             | CAGGATCCGTTGGTCGGAAATC  |

---

|                             |           |                        |
|-----------------------------|-----------|------------------------|
| <i>Vigna radiata</i> : PPO  | PPO.exp.f | GATGGTGCATATCACCAAGTTG |
|                             | PPO.exp.r | GGAGCATCCCAGTTCAAAATG  |
| <i>Vigna radiata</i> : PIN1 | PIN.exp.f | ACAGAGGCGCCAGAATGTTG   |
|                             | PIN.exp.r | TGACGGTGACGTGGAGCTTTC  |

---

## References

1. Regensburger, B. & Hennecke, H. RNA polymerase from *Rhizobium japonicum*. *Arch. Microbiol.* **135**, 103–109 (1983).
2. Wenzel, M., Friedrich, L., Göttfert, M. & Zehner, S. The type III-secreted protein NopE1 affects symbiosis and exhibits a calcium-dependent autocleavage activity. *Mol. Plant-Microbe Interact.* **23**, 124–129 (2010).
3. Somta, P., Sommanas, W. & Srinives, P. Molecular diversity assessment of AVRDC-The World Vegetable Center elite-parental mungbeans. *Breed. Sci.* **59**, 149–157 (2009).
4. Tantasawat, P. A., Khajudparn, P., Prajongjai, T. & Poolsawat, O. Heterosis for the improvement of yield in mungbean [*Vigna radiata* (L.) wilczek]. *Genet. Mol. Res.* **14**, 10444–10451 (2015).
5. Ngampongsai, S. et al. Current Status of Mungbean and the Use of Mutation Breeding in Thailand. *F. Crop. Res.* **1**, 1–6 (2008).
6. View of Genetic relationship of mungbean and blackgram genotypes based on agronomic and photosynthetic performance and SRAP markers.pdf.
7. View of Mutant Mungbean Lines from Radiation and Chemical Induction.pdf
